responsible" seems to me a hyperreaction on the part of your correspondents.

DENNIS T. GLAUBER, M.D.  
*Assistant Professor of Anesthesiology  
Department of Anesthesiology, RN-10*

*University of Washington  
Seattle, Washington 98195*

*(Accepted for publication January 5, 1988.)*

The addendum to which Dr. Goudsouzian *et al.* and Dr. Glauber refer was mistakenly published without editorial approval.

*Ronald D. Miller, M.D., Editor*

Anesthesiology  
68:649, 1988

### A Modification of Magill's Forceps

*To the Editor:*—Many anesthesiologists have experienced the frustration of air leaking through a torn endotracheal tube cuff after using Magill's forceps.<sup>1</sup> We have modified Magill's forceps by filing off the teeth of the forceps and making the two grasping surfaces smooth. Following this modification, we have not experienced any problems from torn cuffs. Furthermore, no air leaks have occurred after deliberately grasping the cuff 20 times with the modified forceps.

NEOH CHOO AUN, M.D.  
B. JAWAN, M.D.

J. H. LEE, M.D.  
*Department of Anesthesiology  
Chang Gung Memorial Hospital at Kaohsiung  
123, Ta-Pei Road, Niao Sung Hsiang  
Kaohsiung Hsien, Taiwan  
Republic of China*

#### REFERENCE

1. Shah JB, Nossaman BD: An additional use for the esophageal stethoscope. *ANESTHESIOLOGY* 65:453, 1986

*(Accepted for publication December 7, 1987.)*

Anesthesiology  
68:649, 1988

### Malignant Hyperthermia, Congenital Anomalies, and DNA Linkage Analysis

*To the Editor:*—We are engaged in an effort to add malignant hyperthermia (MH) to the list of neuromuscular disorders in which a DNA marker is available for genetic counselling and screening.<sup>1</sup> Even though recent advances assure at least a 95% success rate in examination of a kindred's entire genome,<sup>2</sup> the search is considerably narrowed if the gene can first be assigned to a specific chromosome. Chromosomal deletions, translocations, and duplications that may give rise to dysmorphic features are detectable with a high degree of resolution by contemporary cytogenetics. The association of MH with congenital anomalies, such as the King Syndrome,<sup>3</sup> therefore affords a unique opportunity to ascertain the likeliest chromosome for DNA linkage analysis. We request that colleagues having knowledge of MH occurring in patients with congenital anomalies contact us at the address below. A brief clinical history, and 10cc of blood from children or 50cc from adults, would be all that is required of appropriate individuals.

KIRK J. HOGAN, M.D.  
*Assistant Professor  
Department of Anesthesiology*

RON G. GREGG, PH.D.  
*Department of Genetics  
University of Wisconsin Medical Center  
600 Highland Avenue, B6/387  
Madison, Wisconsin 53792*

#### REFERENCES

1. Martin JB: Molecular genetics: Applications to the clinical neurosciences. *Science* 238:765-772, 1987
2. Donis-Keller H, Green P, Helms C, *et al*: A genetic linkage map of the human genome. *Cell* 51:319-337, 1987
3. McPherson EW, Taylor CA: The King Syndrome: Malignant hyperthermia, myopathy, and multiple anomalies. *Am J Med Genet* 8:159-165, 1981

*(Accepted for publication December 7, 1987.)*
